# Supplementary material
Source: PubMed Central journal article supplement (PMC1570103)

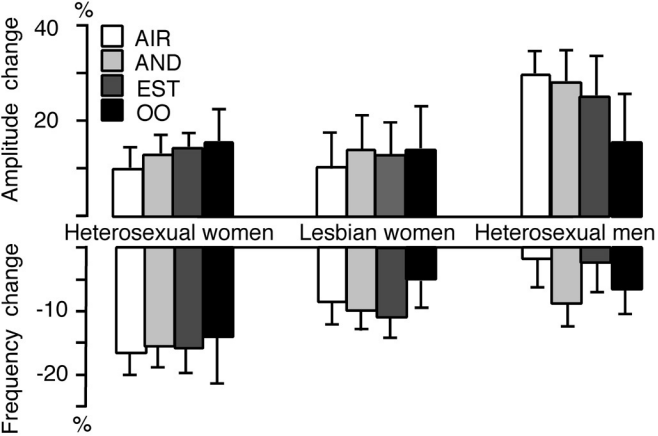

Supplement: pnas_0600331103_3.pdf [file pnas_0600331103_3.pdf]
